# Supplementary material
Source: PubMed Central journal article supplement (PMC8294132)
Supplement: NIHMS1716604-supplement-sm.pdf [file NIHMS1716604-supplement-sm.pdf]

# **Supplementary Figures**

**Fig. S1**

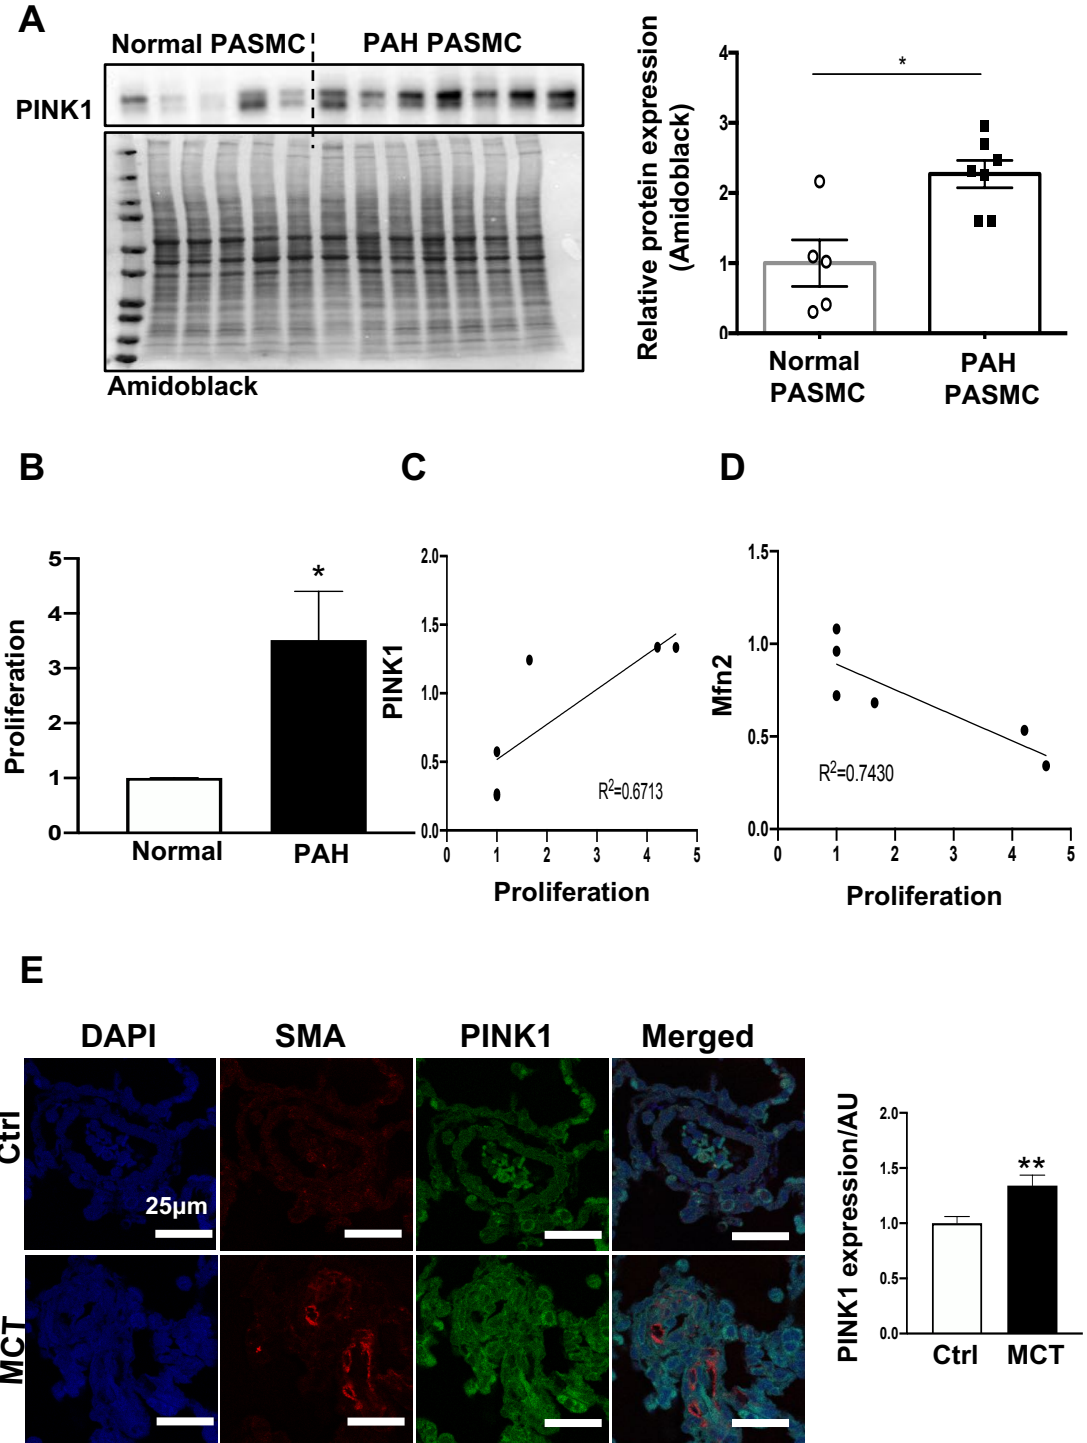

**Fig. S1 (continued)**

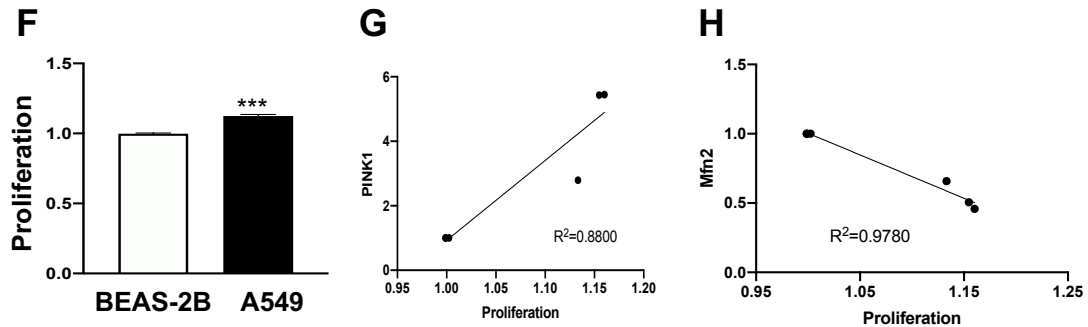

**S1: PINK1 is upregulated in human and MCT PAH and proliferation of human PASMC is positively correlated with PINK1 expression and inversely correlated with Mfn2 expression.**

**A) Representative immunoblots and densitometry demonstrating increased protein expression of PINK1 in human PAH PASMC vs normal human PASMC (n=5 for normal PASMC and n=7 for PAH PASMC). The protein expression was normalized to amidoblack. \* $P < 0.05$ .**

**B) PAH PASMC proliferates faster than normal human PASMC (n=3 for normal PASMC and n=3 for PAH PASMC). \* $P < 0.05$ .**

**C) PINK1 expression is positively correlated to the proliferation of PASMC.** Correlation analysis showing that expression level of PINK and proliferation of PASMC are positively correlated (n=6).  $R^2=0.6713$ .

**D) Mfn2 expression is inversely correlated to the proliferation of PASMC.** Correlation analysis showing that expression level of Mfn2 and proliferation of PASMC are inversely correlated (n=6).  $R^2=0.7430$ .

**E) PINK1 is upregulated in MCT PAH.** Representative cross section images of small pulmonary arteries indicating increased PINK1 expression in MCT PAH rats. (n=14-15/group). \*\* $P < 0.01$ . Scale bar: 25 $\mu$ m.

**F) NSCLC cells, A549, proliferates faster than the non-neoplastic cells, BEAS-2B (n=3). \*\*\* $P < 0.001$ .**

**G) PINK1 expression is positively correlated to the proliferation of A549 and BEAS-2B cells.** Correlation analysis showing that expression level of PINK and proliferation of A549 and BEAS2B cells are positively correlated (n=6).  $R^2=0.8800$ .

**H) Mfn2 expression is inversely correlated to the proliferation of A549 and BEAS-2B cells.** Correlation analysis showing that expression level of Mfn2 and proliferation of A549 and BEAS2B cells are inversely correlated (n=6).  $R^2=0.09780$ .

**Fig. S2**

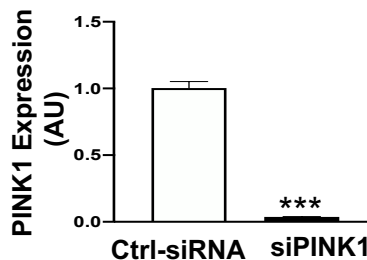

**S2: Knockdown efficiency of siPINK1 in A549 cells.** RNA analyses were performed with qRT-PCR 48 hours after transfection (n=3/group). \*\*\* $P < 0.001$ .

**Fig. S3**

**A**

| Program     | Site | Sequence  | Score | Prediction |
|-------------|------|-----------|-------|------------|
| NetPhos 2.0 | S442 | IRRLSVLVD | 0.993 | *S*        |

| Program      | Position | Sequence | Corresponding motif | Features of motifs               |
|--------------|----------|----------|---------------------|----------------------------------|
| PhosphoMotif | 440-442  | RSL      | RXpS                | Protein kinase A substrate motif |

<http://www.cbs.dtu.dk/services/NetPhos/>

**B**

|            |       |           |       |         |
|------------|-------|-----------|-------|---------|
| # Sequence | 442 S | IRRLSVLVD | 0.993 | unsp    |
| # Sequence | 442 S | IRRLSVLVD | 0.859 | PKA     |
| # Sequence | 442 S | IRRLSVLVD | 0.545 | RSK     |
| # Sequence | 442 S | IRRLSVLVD | 0.459 | GSK3    |
| # Sequence | 442 S | IRRLSVLVD | 0.458 | CaM-II  |
| # Sequence | 442 S | IRRLSVLVD | 0.396 | cdc2    |
| # Sequence | 442 S | IRRLSVLVD | 0.390 | ATM     |
| # Sequence | 442 S | IRRLSVLVD | 0.368 | CKI     |
| # Sequence | 442 S | IRRLSVLVD | 0.362 | PKG     |
| # Sequence | 442 S | IRRLSVLVD | 0.358 | PKC     |
| # Sequence | 442 S | IRRLSVLVD | 0.347 | DNAPK   |
| # Sequence | 442 S | IRRLSVLVD | 0.326 | CKII    |
| # Sequence | 442 S | IRRLSVLVD | 0.313 | p38MAPK |
| # Sequence | 442 S | IRRLSVLVD | 0.210 | PKB     |
| # Sequence | 442 S | IRRLSVLVD | 0.173 | cdk5    |

**S3:** A) Serine 442 of mitofusin2 amino acid sequence is a candidate phosphorylation site of protein kinase A predicted by NetPhos 2.0 and PhosphoMotif programs with high possibility. B) FASTA from <http://www.cbs.dtu.dk/services/NetPhos/> showing PKA is the predicted kinase with highest score that can phosphorylate serine 442 site of Mfn2.

**Fig. S4**

**PAH PASMC**

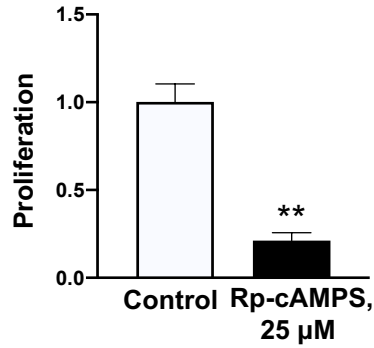

**S4: Pharmacological inhibition of PKA inhibits cell proliferation in PAH PASMC.** PAH PASMCs were treated with or without the PKA inhibitor, Rp-cAMPS (25  $\mu$ M). Cell proliferation was analyzed by Click-iT EdU flow cytometry assay kit 72 hours following treatment (n=3/group). \*\* $P < 0.01$ .

**Fig. S5**

**A549**

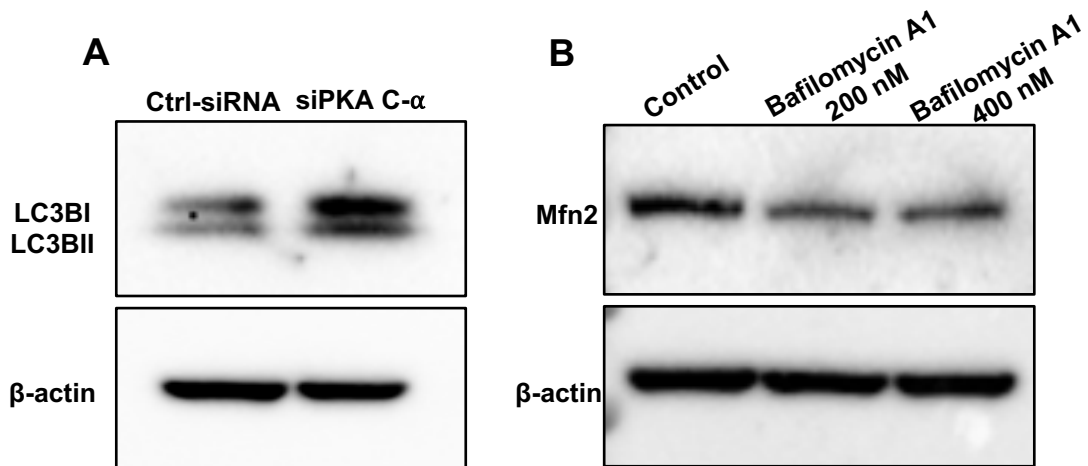

**S5: Upregulation of Mfn2 following PKA silencing is not due to inhibition of mitophagy or lysosomal inhibition.** Representative immunoblots showing A) expression of LC3BII 48 hours following siPKA C- $\alpha$  silencing; B) expression of Mfn2 following 24 hours of treatment with a lysosomal inhibitor bafilomycin A1.  $\beta$ -actin was used as the loading control.

**Fig. S6**

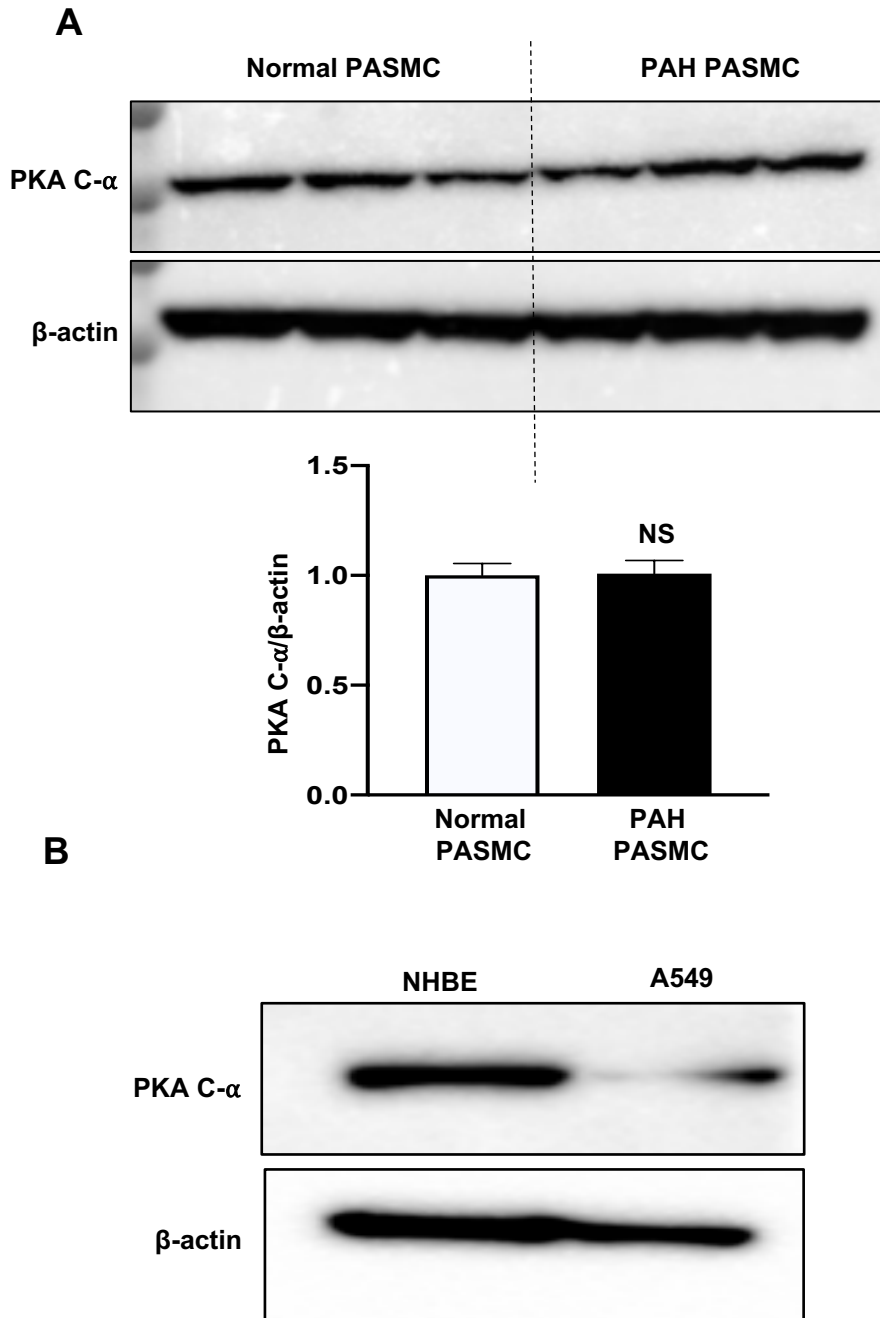

**S6:** A) Representative immunoblots and densitometry showing the expression of PKA-C- $\alpha$  in normal vs PAH PASC (n=3). NS: not significant. B) Representative immunoblot showing the expression of PKA-C- $\alpha$  in NHBE vs A549 cells.

**Fig. S7**

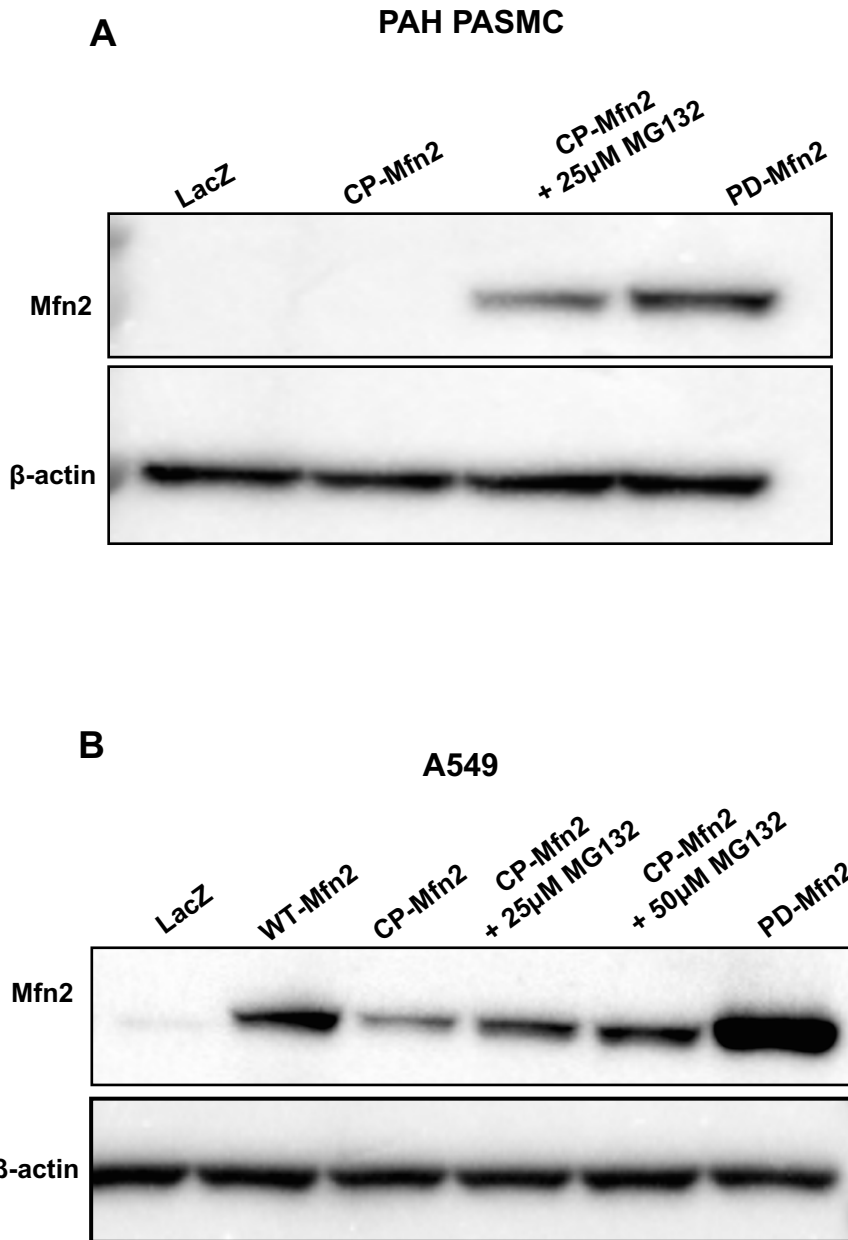

**S7: Representative immunoblots showing increased expression of CP-Mfn2 following proteasomal blockade.** A) PAH PASM C and B) A549 cells were infected by adenovirus carrying indicated Mfn2 constructs for 40 hours. CP-Mfn2 overexpressed cells were treated with or without the indicated dose of a proteasome inhibitor, MG132 for 8 hours before harvesting.  $\beta$ -actin was used as the loading control.

**Fig. S8**

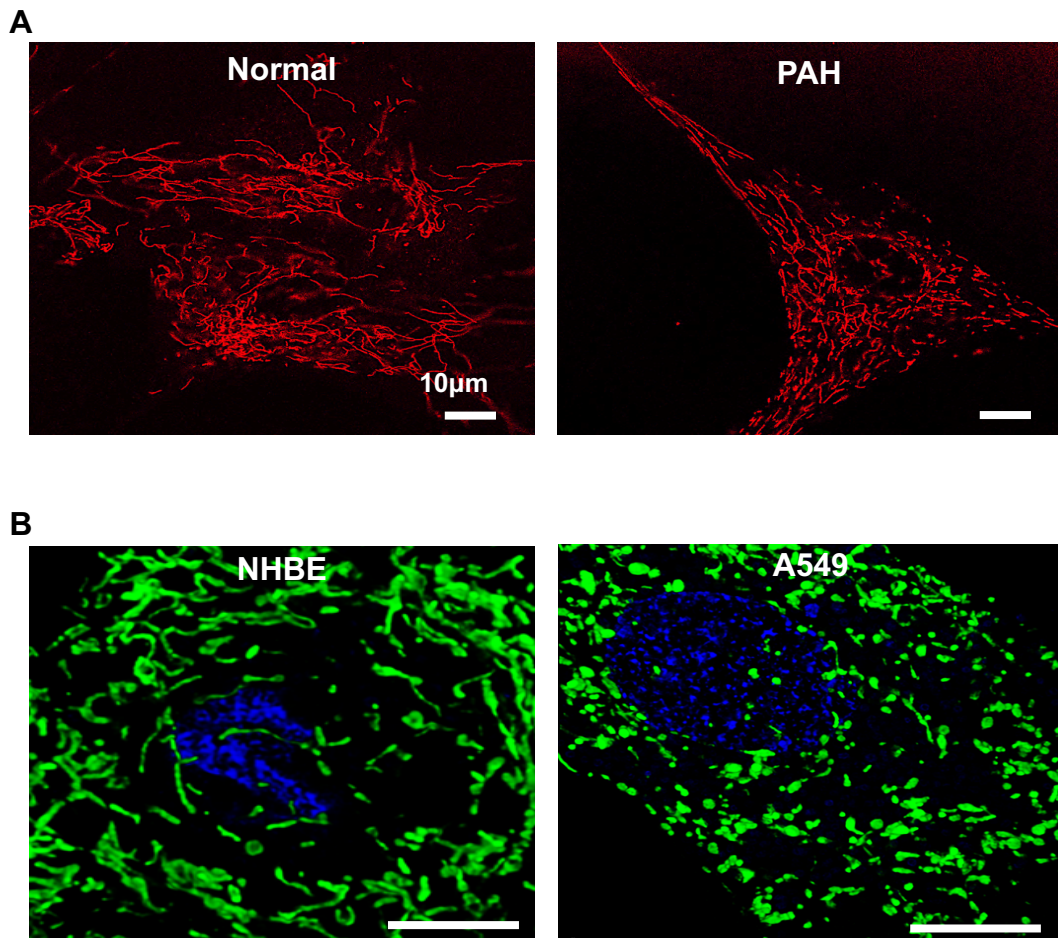

**S8: PAH PASC and NSCLC cells have fragmented mitochondrial network.** Representative images of mitochondrial networks of A) Normal PASC and PAH PASC and B) NHBE and A549. Cells were stained with either TMRM (red) or Mitotracker Green (green). Scale bar: 10μm.



**Fig. S9**

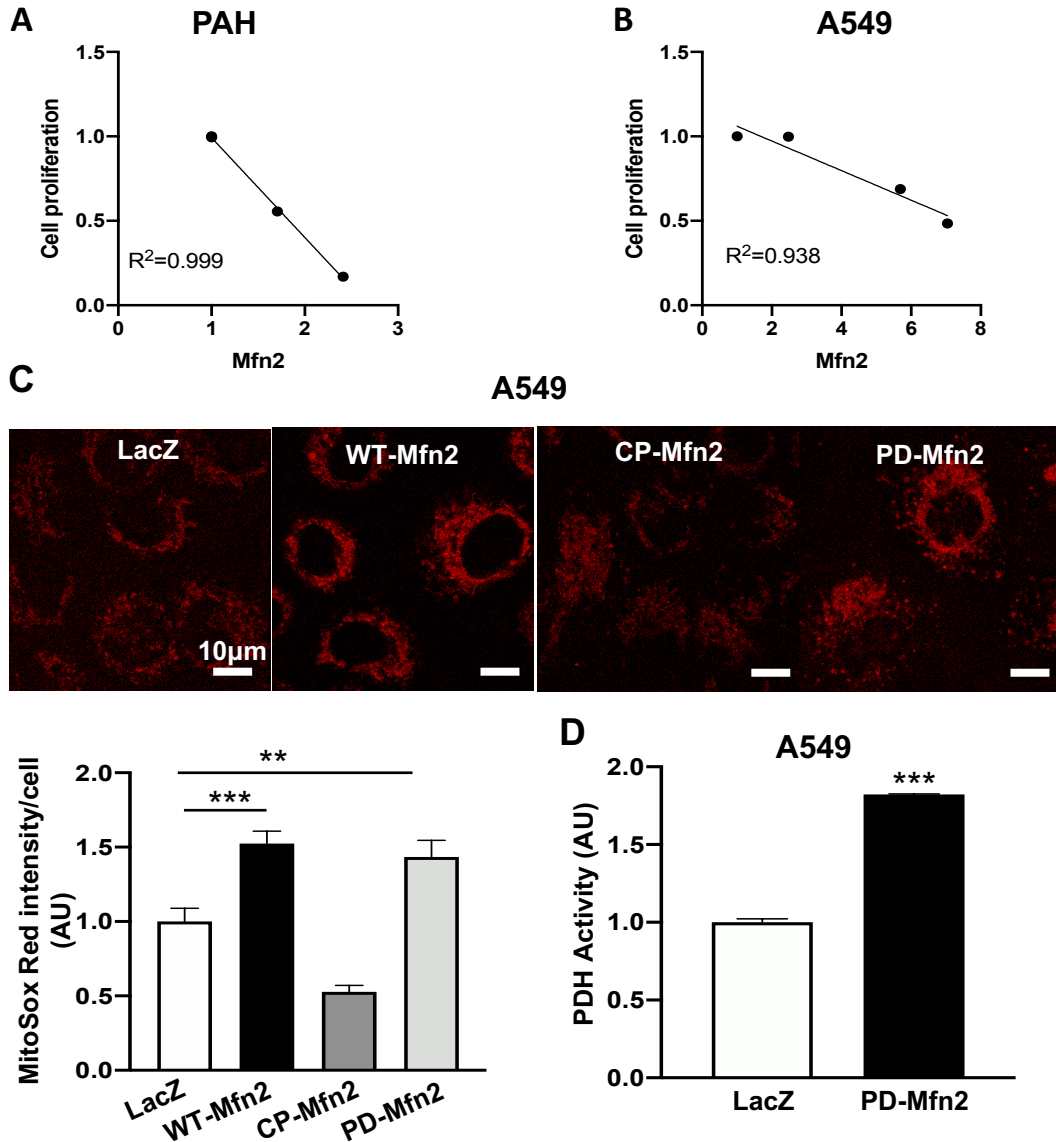

**S9 A-B) Correlation analyses showing cell proliferation is inversely correlated with Mfn2 expression in A) PAH PASMC and B) A549 cells.** Mfn2 constructs (LacZ, WT-Mfn2, CP-Mfn2 and PD-Mfn2) were overexpressed by adenoviral infection (n=3-4).  $R^2=0.999$  for PAH PASMC and  $R^2=0.938$  for A549 cells.

**C) Mfn2 overexpression increases mitochondrial ROS generation.** The A549 cells were infected with adenovirus carrying PD-Mfn2 constructs. Adenovirus carrying LacZ gene was used as a control. Mitochondrial ROS generation was assessed by staining the cells with MitoSOX™ Red Mitochondrial Superoxide Indicator 48 hours post infection. (n=19-20 cells/group).  $**P < 0.01$ ;  $***P < 0.001$ .

**D) PD-Mfn2 increased PDH activity.** The A549 cells were infected with adenovirus carrying PD-Mfn2 constructs. Adenovirus carrying LacZ gene was used as a control. PDH activity assay was conducted 48 hours post infection. (n=3/group).  $***P < 0.001$ .

**Fig. S10**

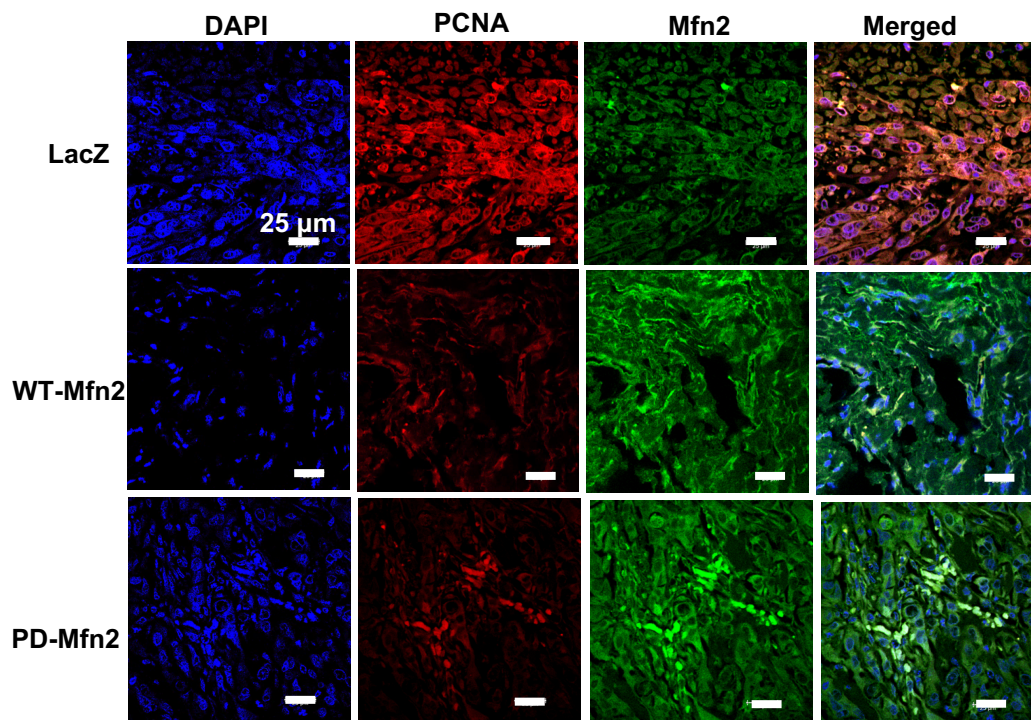

**S10: Representative images of tumor sections indicating a superior regression of tumor growth by PD-Mfn2 treatment. Scale bar: 25 $\mu$ m.**
